# Supplementary material for: Impact of gold nanoparticle size and coating on radiosensitization and generation of reactive oxygen species in cancer therapy
Source: Royal Society of Chemistry journal article supplement (doi:10.1039/d4na00773e), 2025-01-01
Supplement: d4na00773e1.pdf [file d4na00773e1.pdf]

## SUPPLEMENTARY DATA

### TITLE

Impact of gold nanoparticle size and coating on radiosensitization and generation of reactive oxygen species in cancer therapy

### AUTHORS

E. Loscertales<sup>a,b</sup>, R. López-Méndez<sup>c</sup>, J. Mateo<sup>d</sup>, L. M. Fraile<sup>a,e</sup>, J. M. Udias<sup>a,e</sup>, A. Espinosa<sup>f,c</sup>, S. España<sup>a,b,d</sup>

<sup>a</sup> Grupo de Física Nuclear, EMFTEL & IPARCOS, Universidad Complutense de Madrid, Pl. de las Ciencias, 1, Moncloa-Aravaca, Madrid, Spain

<sup>b</sup> Instituto de Tecnologías Físicas y de la Información “Leonardo Torres Quevedo” (ITEFI-CSIC), C/Serrano, 144, Madrid, Spain

<sup>c</sup> IMDEA Nanociencia, C. Faraday, 9, Fuencarral-El Pardo, Madrid, Spain

<sup>d</sup> Centro Nacional de Investigaciones Cardiovasculares (CNIC), C. de Melchor Fernández Almagro, 3, Fuencarral-El Pardo, Madrid, Spain

<sup>e</sup> Instituto de Investigación del Hospital Clínico San Carlos (IdISSC), C. del Prof Martín Lagos, S/N, Moncloa-Aravaca, Madrid, Spain

<sup>f</sup> Instituto de Ciencia de Materiales de Madrid (ICMM-CSIC), Campus de Cantoblanco, C. Sor Juana Iés de la Cruz, 3, Fuencarral-El Pardo, Madrid, Spain

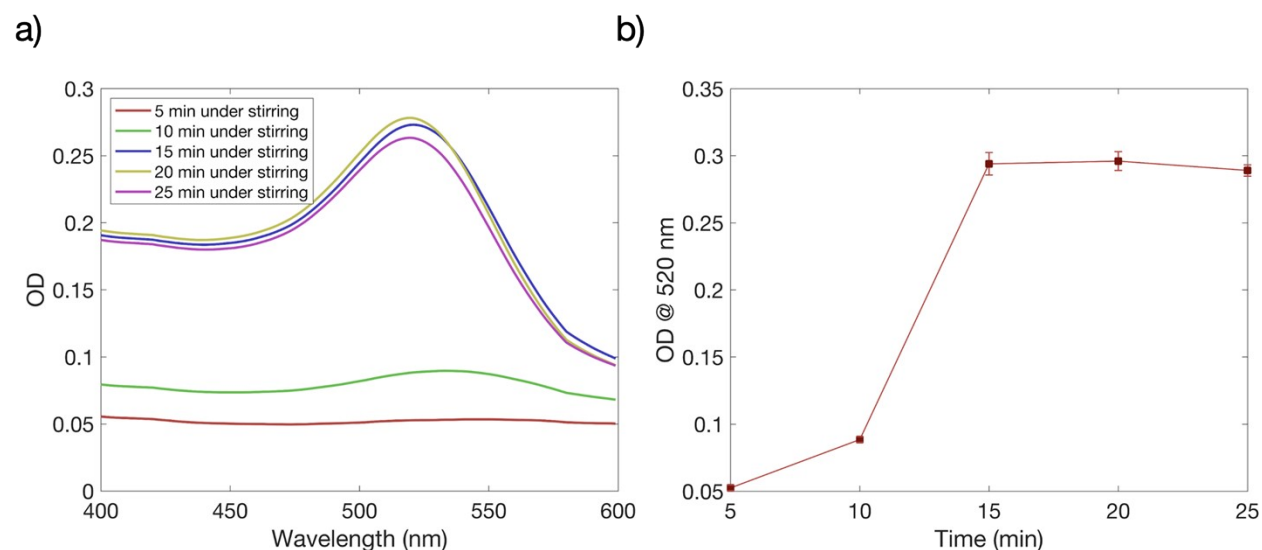

Figure S1. The growth of G20 citrate AuNPs was monitored by recording their optical density at different reaction times. Panel (a) shows the UV-vis spectra and panel (b) shows the increase of the OD@520nm with the reaction time.

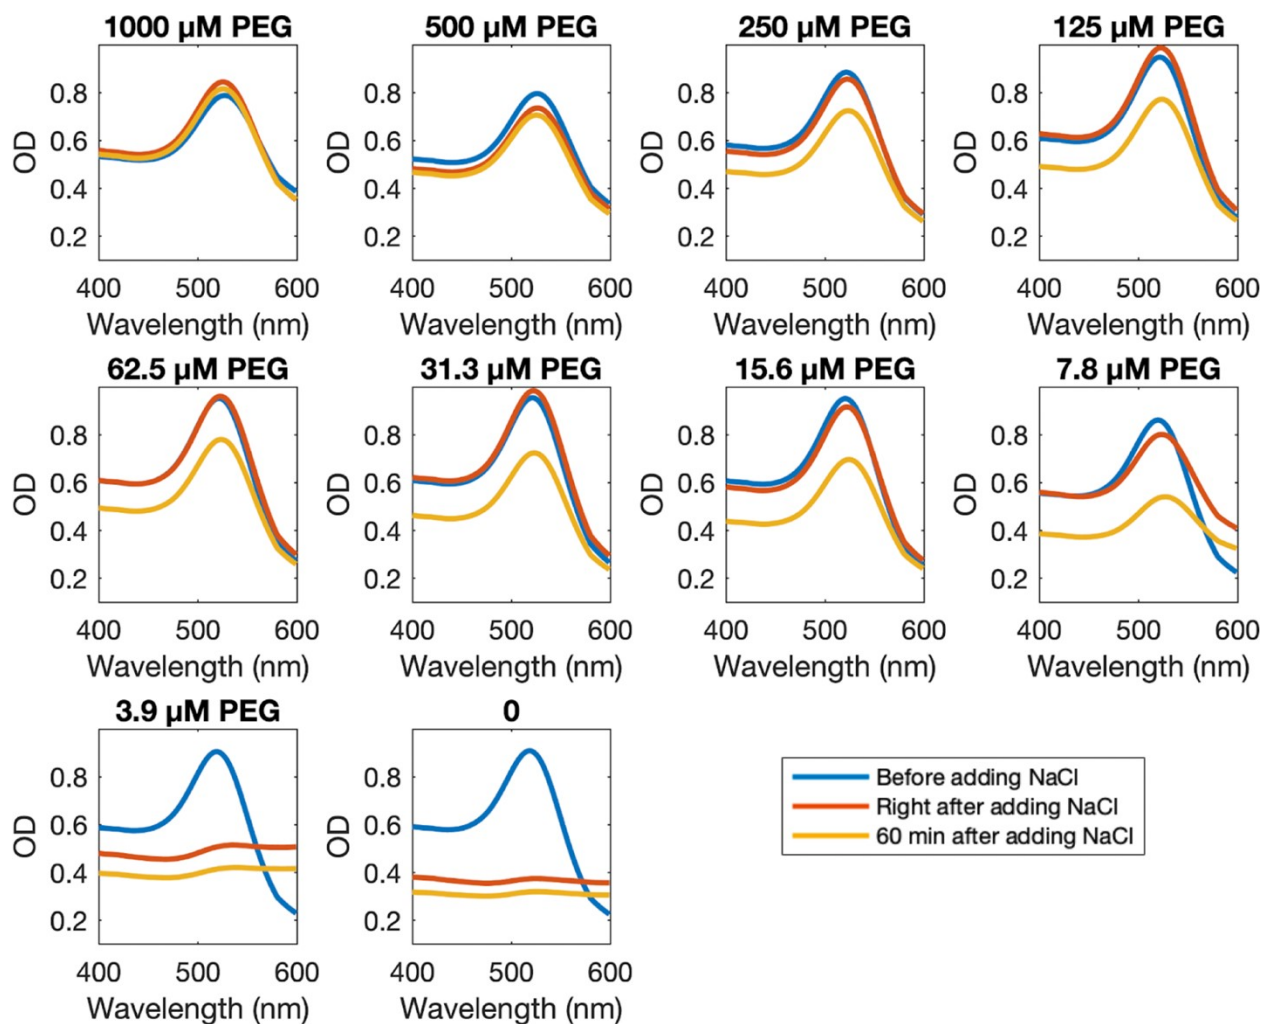

Figure S2. G20 Citrate AuNPs incubated with PEG at different concentrations before, right after and 60 minutes after adding NaCl (250  $\mu\text{M}$ ).

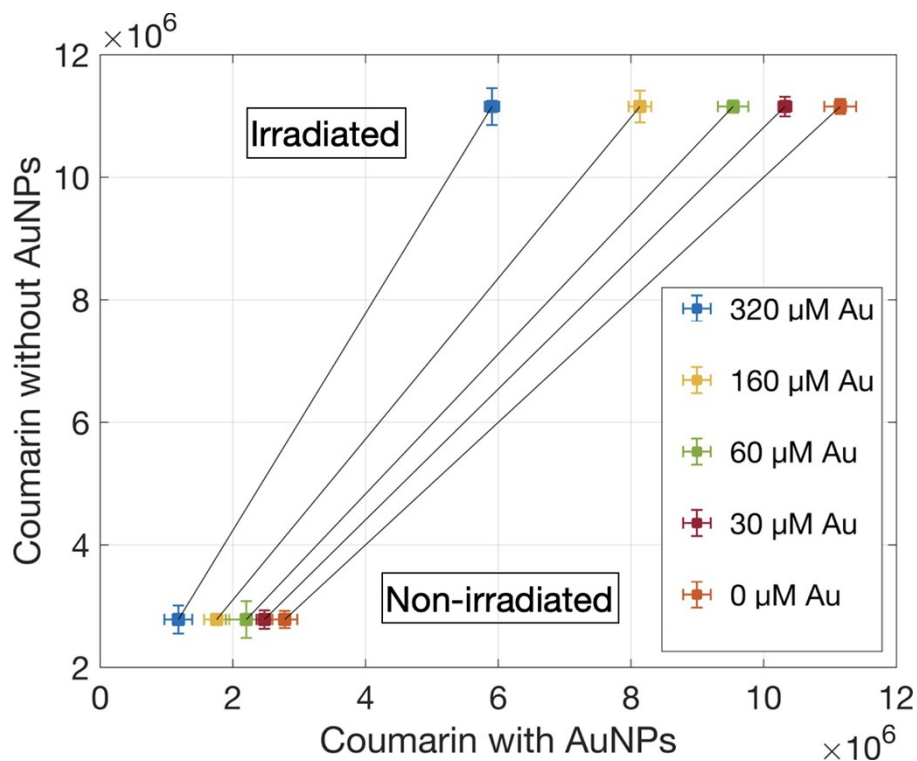

Figure S3. Calibration curves obtained for the attenuation of coumarin fluorescence by G20 Citrate AuNPs at different concentrations (30 - 320  $\mu\text{M}$  Au). Fluorescent values of irradiated and non-irradiated coumarin are compared for samples with and without AuNPs.

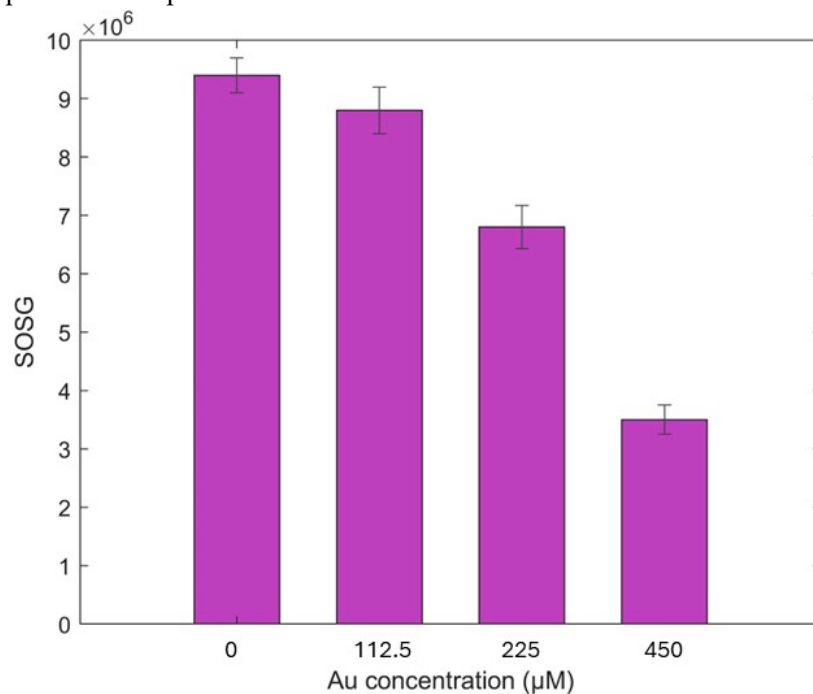

Figure S4. SOSG fluorescence was measured at the supernatant after mixing it with different concentrations of G20 Citrate AuNPs during 1 hour and centrifuge the mixture for 45 minutes. Values drop for higher Au concentration due to adsorption of SOSG to citrate capped AuNPs.

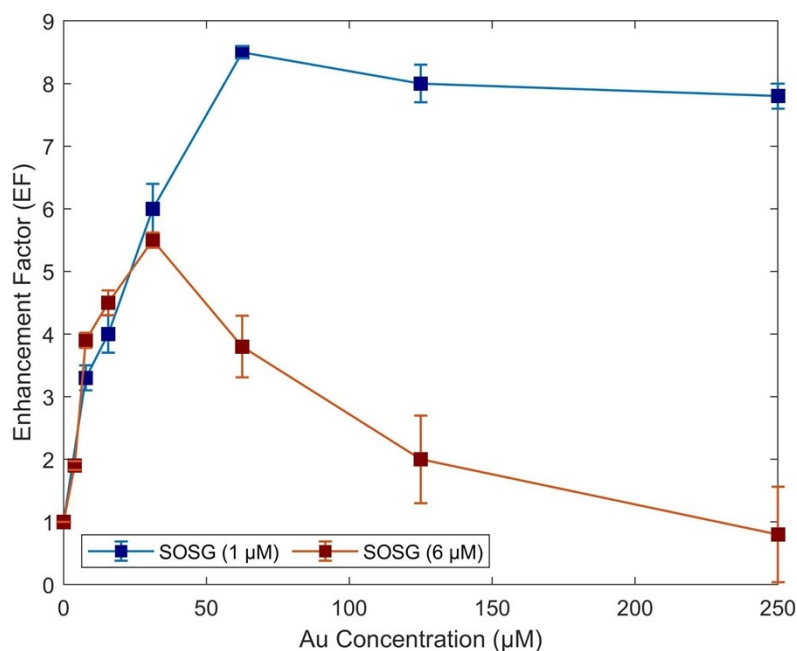

Figure S5. EF of  $^1\text{O}_2$  for G20 PEG AuNPs under  $\gamma$  photon irradiation as a function of Au concentration when SOSG concentration was 1 or 6  $\mu\text{M}$ .

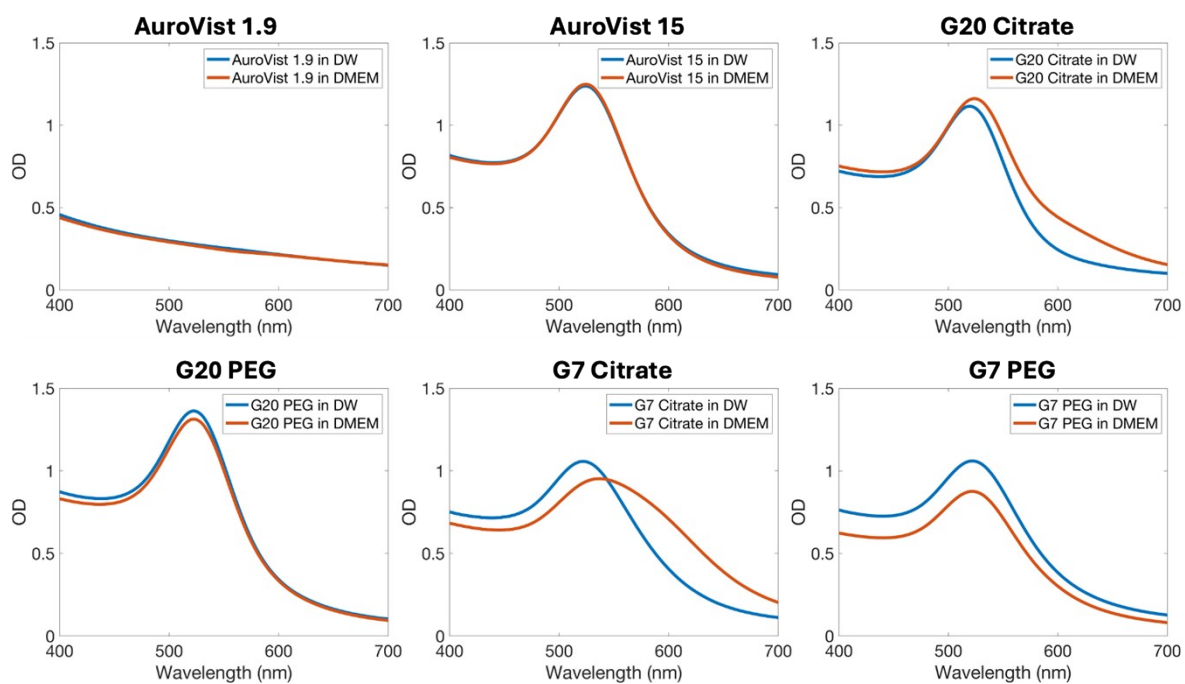

Figure S6. UV-Vis spectroscopy measurements of AuNPs after 24 h of incubation dispersed either in water or in DMEM supplemented with 10% FBS to check their stability.
